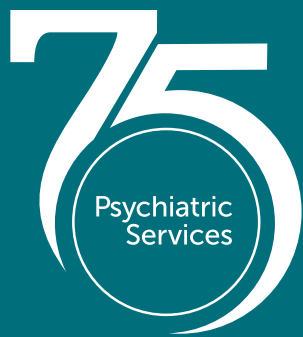

# Psychiatric Services

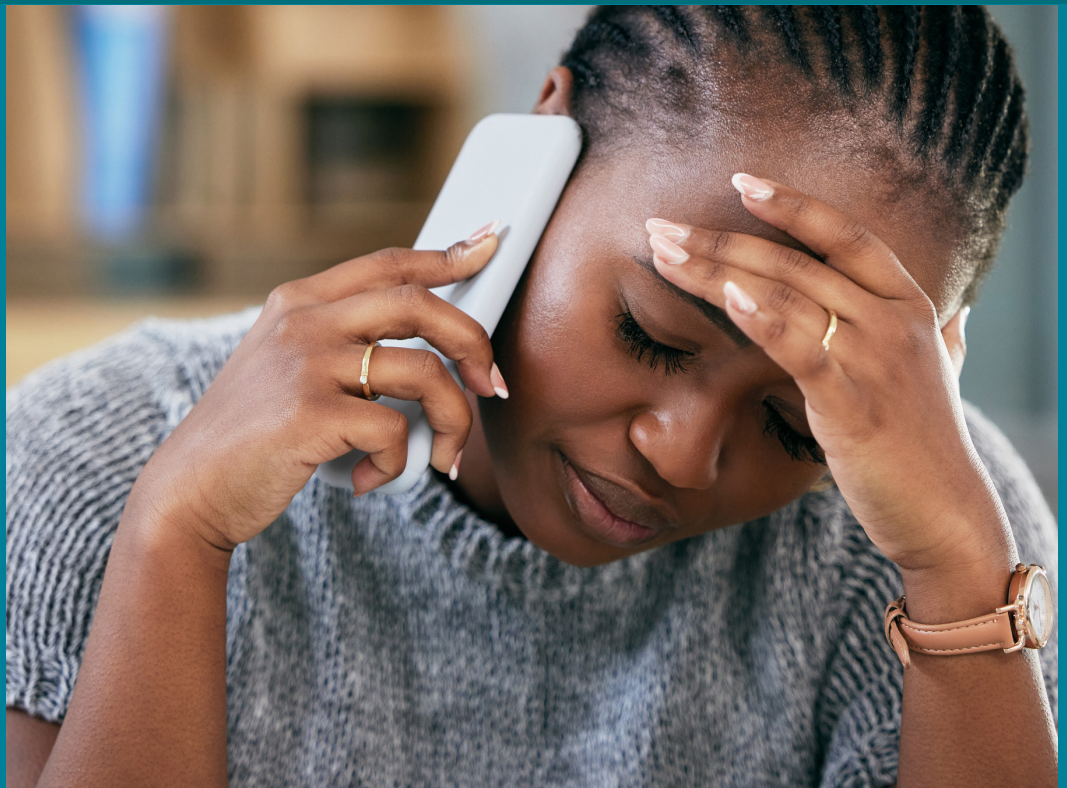

Difficulty getting community mental health appointments for adolescents

A tale of two taxes: paying for behavioral health services in two states

Psychotropic prescribing across medical providers, 2016–2019

The ultimate intercept for preventing criminal legal system involvement
